# Supplementary material for: The surfactant-free synthesis of hollow CuS nanospheres via clean Cu2O templates and their catalytic oxidation of dye molecules with H2O2
Source: Royal Society of Chemistry journal article supplement (doi:10.1039/c6ra19447h), 2016-01-01
Supplement: c6ra19447h1.pdf [file c6ra19447h1.pdf]

## Supporting Information

### **Surfactant-free synthesis of hollow CuS nanospheres via clean Cu<sub>2</sub>O templates and its catalytic oxidation of dye molecules with H<sub>2</sub>O<sub>2</sub>**

Lei Bai<sup>a\*</sup>, Xiangju Ye<sup>a</sup>, Changchun Song<sup>a</sup>, Houli Chen<sup>a</sup>, Baogui Cai<sup>a</sup>, Yuwei Bai<sup>a</sup>,  
Chenchen Xu<sup>a,b</sup> and Zirong Li<sup>a\*</sup>

<sup>a</sup> College of Chemistry and Materials Engineering, University of Science and Technology of Anhui, Donghua Road, Fengyang, Eastern Bengbu, Anhui, China, 233100

<sup>b</sup> Key Laboratory of Flexible Electronics and Institute of Advanced Materials, Jiangsu National Synergistic Innovation Center for Advanced Materials, Nanjing Tech University, Nanjing 211816, China.

Email address: baileiwj2014@163.com; lizir@ahstu.edu.cn

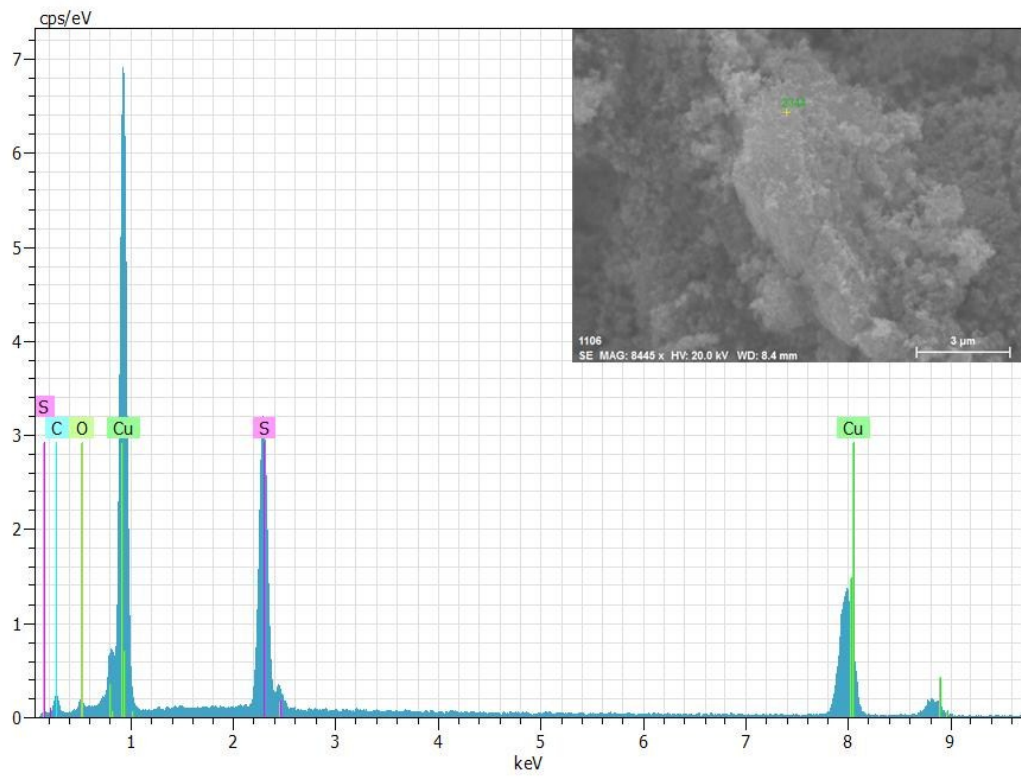

SFigure 1. SEM-EDX result of hollow CuS nanospheres.

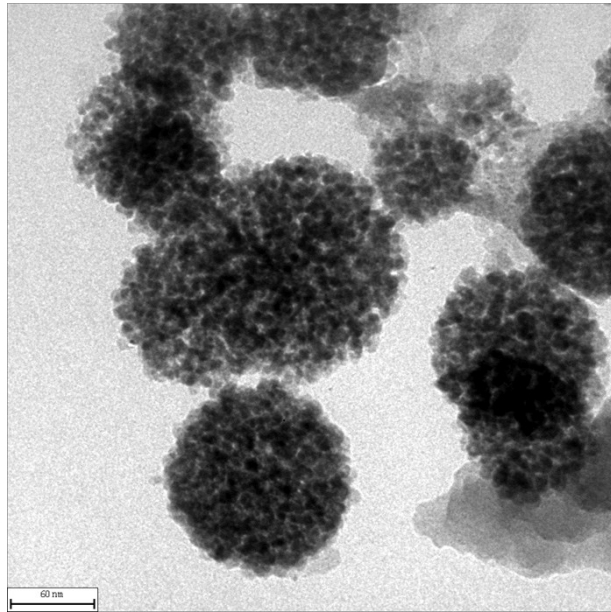

SFig. 2. TEM image of Cu<sub>2</sub>O nanoaggregates.

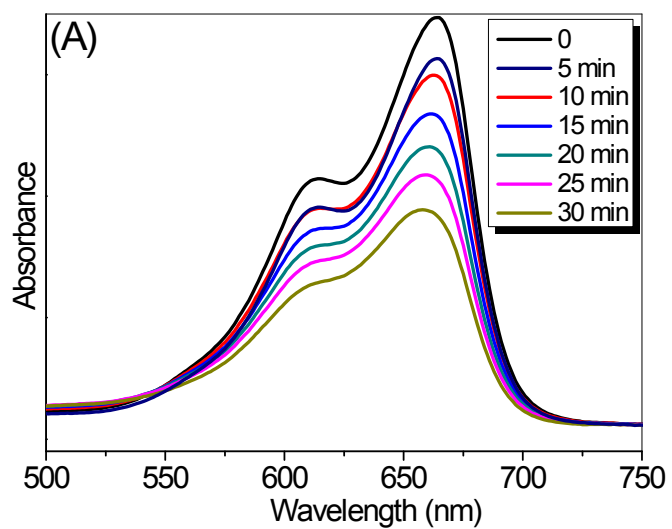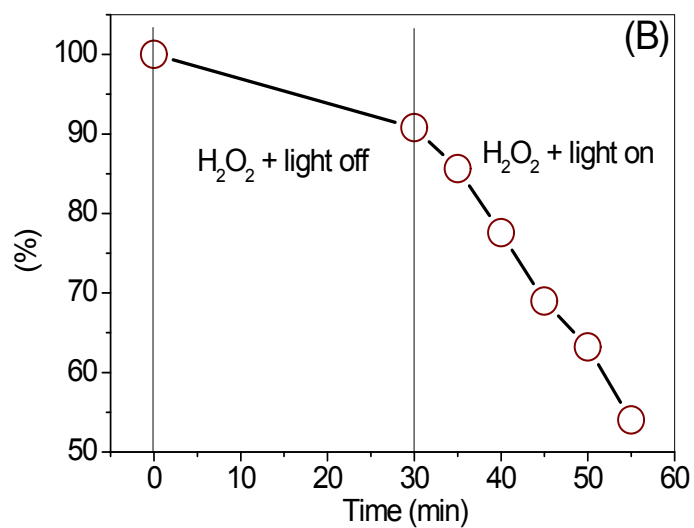

SFig.3. UV-Vis spectra (A) and degradation efficiency (B) of MB (10 ppm, 100 mL) in the presence of H<sub>2</sub>O<sub>2</sub> without CuS hollow nanospheres.
